# Supplementary material for: The Flavonol Quercitrin Hinders GSK3 Activity and Potentiates the Wnt/β-Catenin Signaling Pathway
Source: MDPI journal article supplement (doi:10.3390/ijms232012078), 2022-10-11
Supplement: s1 [file s1]

# Supporting Information for

## **The flavonol quercitrin hinders GSK3 activity and potentiates the Wnt/ $\beta$ -catenin signaling pathway**

Danilo Predes<sup>1,†</sup>, Lorena A. Maia<sup>1</sup>, Isadora Matias<sup>1</sup>, Hannah Paola Mota Araujo<sup>2</sup>, Carolina Soares<sup>2</sup>, Fernanda G. Q. Barros-Aragão<sup>2</sup>, Luiz F. S. Oliveira<sup>1</sup>, Renata R. Reis<sup>1</sup>, Nathalia G. Amado<sup>1,‡</sup>, Alessandro B. C. Simas<sup>3</sup>, Fabio A. Mendes<sup>1</sup>, Flávia C. A. Gomes<sup>1</sup>, Claudia P. Figueiredo<sup>2</sup>, Jose G. Abreu<sup>1</sup>

<sup>1</sup> Instituto de Ciências Biomédicas, Universidade Federal do Rio de Janeiro, Rio de Janeiro 21941-902, Brazil

<sup>2</sup> Faculdade de Farmácia, Universidade Federal do Rio de Janeiro, Rio de Janeiro 21941-901, Brazil

<sup>3</sup> Instituto de Pesquisas de Produtos Naturais Walter Mors, Universidade Federal do Rio de Janeiro, Rio de Janeiro 21941-901, Brazil

\* Correspondence: garciajr@icb.ufrj.br; Tel: +55-21-3938-6486

<sup>†</sup> Current Address: F. M. Kirby Neurobiology Center, Boston Children's Hospital, Harvard Medical School, Boston, MA 02115, USA

<sup>‡</sup> Current Address: Department of Urology, University of Texas Southwestern Medical Center, Dallas, TX 75390, USA.

### **This PDF file includes:**

Materials and Methods  
Figures. S1 to S5

## Materials and Methods

### KEY RESOURCES TABLE

| REAGENT or RESOURCE                      | SOURCE                       | IDENTIFIER                            |
|------------------------------------------|------------------------------|---------------------------------------|
| Antibodies                               |                              |                                       |
| Synaptophysin                            | Vector Laboratories          | Cat# VP-S285,<br>RRID:AB_2336747      |
| Synaptophysin                            | Millipore                    | Cat# MAB368,<br>RRID:AB_94947         |
| Homer-1                                  | Abcam                        | Cat# ab184955,<br>RRID:AB_2744679     |
| PSD-95                                   | Cell Signaling<br>Technology | Cat# 2507,<br>RRID:AB_561221          |
| PSD-95                                   | Abcam                        | Cat# ab18258,<br>RRID:AB_444362       |
| $\alpha$ -tubulin                        | Sigma                        | Cat# T9026,<br>RRID:AB_477593         |
| $\beta$ -actin                           | SCBT                         | Cat# sc-47778 HRP,<br>RRID:AB_2714189 |
| $\beta$ -catenin                         | BD                           | Cat# 610154,<br>RRID:AB_397555        |
| phosphorylated $\beta$ -catenin S33, S37 | Cell Signaling<br>Technology | Cat# 2009,<br>RRID:AB_2088238         |
| Cyclophilin B                            | Cell Signaling<br>Technology | Cat# SAB4200201,<br>RRID:AB_10743624  |
| Flag-M2                                  | Sigma                        | Cat# F1804,<br>RRID:AB_262044         |
| GAPDH                                    | Cell Signaling<br>Technology | #Cat# 5174,<br>RRID:AB_10622025       |
| GSK3 $\beta$                             | Cell Signaling<br>Technology | Cat# 9315,<br>RRID:AB_490890          |
| phosphorylated GSK3 $\beta$ S9           | Cell Signaling<br>Technology | Cat# 9323,<br>RRID:AB_2115201         |
| LRP6                                     | Millipore                    | Cat# MAB368,<br>RRID:AB_94947         |
| AlexaFluor 488 Goat anti-Rabbit          | Invitrogen                   | Cat# A-11008,<br>RRID:AB_143165       |
| AlexaFluor 488 Goat anti-Mouse           | Invitrogen                   | Cat# A-11001,<br>RRID:AB_2534069      |
| AlexaFluor 546 Goat anti-Mouse           | Invitrogen                   | Cat# A-11003,<br>RRID:AB_141370       |
| AlexaFluor 555 Goat anti-Rabbit          | Invitrogen                   | Cat# A-21428,<br>RRID:AB_141784       |
| IRDye 680                                | LI-COR                       | Cat# 926-68072,<br>RRID:AB_10953628   |
| IRDye 800                                | LI-COR                       | Cat# 926-32213,<br>RRID:AB_621848     |
| Goat anti-Rabbit IgG, HRP                | Invitrogen                   | Cat# 31460,<br>RRID:AB_228341         |
| Goat anti-Mouse IgG, HRP                 | Invitrogen                   | Cat# 31430,<br>RRID:AB_228307         |
|                                          |                              |                                       |

|                                                         |                                      |                                    |
|---------------------------------------------------------|--------------------------------------|------------------------------------|
| Chemicals, Peptides, and Recombinant Proteins           |                                      |                                    |
| Quercitrin                                              | Sigma                                | Cat# 00740580, CAS Number 522-12-3 |
| DMSO                                                    | Sigma                                | Cat# D4540, CAS Number 67-68-5     |
| XAV939                                                  | Sigma                                | Cat# X3004, CAS Number 284028-89-3 |
| BIO                                                     | Sigma                                | Cat# B1686, CAS Number 667463-62-9 |
| Cytosine arabinoside                                    | Sigma                                | Cat# C1768, CAS Number 147-94-4    |
| rhWnt3a                                                 | StemRD                               | Cat# W3A-H-005                     |
| Pierce™ Protease and Phosphatase Inhibitor Mini Tablets | Thermo Scientific                    | Cat# A32959                        |
| Prolong Gold Antifade                                   | Invitrogen                           | Cat# P10144                        |
| Lipofectamine 3000                                      | Invitrogen                           | Cat# L3000015                      |
| Lithium chloride (LiCl)                                 | Sigma                                | Cat# L4408                         |
| Immobilon-E                                             | Millipore                            | Cat# IEVH85R                       |
| Immobilon-FL                                            | Millipore                            | Cat# IPFL00010                     |
| SuperSignal West Pico                                   | Pierce                               | Cat# 34079                         |
| SuperSignal Femto Maximum Sensitivity Substrate         | Pierce                               | Cat# 34094                         |
| Blocking Buffer                                         | LI-COR                               | 926-32213                          |
| Critical Commercial Assays                              |                                      |                                    |
| Dual-Luciferase Reporter Assay System                   | Promega                              | Cat# E1960                         |
| mMESSAGE mMACHINE SP6 Transcription kit                 | Invitrogen                           | Cat# AM1340                        |
| Experimental Models: Cell Lines                         |                                      |                                    |
| HEK293T                                                 | ATCC                                 | RRID:CVCL_0063                     |
| RKO B/R                                                 | (Major <i>et al</i> , 2007)          | N/A                                |
| SW480 B/R                                               | (Predes <i>et al</i> , 2019)         | N/A                                |
| L-cell                                                  | ATCC                                 | RRID:CVCL_4536                     |
| L-Wnt3a                                                 | ATCC                                 | RRID:CVCL_0635                     |
| Experimental Models: Organisms/Strains                  |                                      |                                    |
| <i>Xenopus laevis</i>                                   | Xenopus Express, Inc                 | N/A                                |
| Swiss mice                                              | Federal University of Rio de Janeiro | N/A                                |
| Recombinant DNA                                         |                                      |                                    |
| pCS2                                                    | ATCC                                 | RRID:Addgene_16331                 |
| pCS2 GFP-GSK3-MAPK                                      | ATCC                                 | RRID:Addgene_29689                 |
| TOPFLASH                                                | ATCC                                 | RRID:Addgene_12456                 |
| Tk-Renilla                                              | Promega                              | Cat# E2241                         |
| pCS2 <i>Xwnt8</i>                                       | ATCC                                 | RRID:Addgene_16865                 |

|                         |                               |                                                                                                                       |
|-------------------------|-------------------------------|-----------------------------------------------------------------------------------------------------------------------|
| S01234                  | (Brannon <i>et al</i> , 1997) | N/A                                                                                                                   |
| pCS2 LRP6               | ATCC                          | RRID:Addgene_27242                                                                                                    |
| Wnt3a                   | ATCC                          | RRID:Addgene_43810                                                                                                    |
|                         |                               |                                                                                                                       |
| Software and Algorithms |                               |                                                                                                                       |
| ImageJ                  | NIH                           | <a href="https://imagej.nih.gov/ij/">https://imagej.nih.gov/ij/</a>                                                   |
| Puncta Analyzer         | ImageJ 1.29 NIH               | RRID: SCR_003070                                                                                                      |
| Prism 7                 | GraphPad                      | <a href="https://www.graphpad.com/scientific-software/prism/">https://www.graphpad.com/scientific-software/prism/</a> |
| ANY-maze software       | Stoelting Company             | <a href="http://www.anymaze.co.uk/">http://www.anymaze.co.uk/</a>                                                     |
|                         |                               |                                                                                                                       |
| Other                   |                               |                                                                                                                       |
|                         |                               |                                                                                                                       |
|                         |                               |                                                                                                                       |
|                         |                               |                                                                                                                       |
|                         |                               |                                                                                                                       |
|                         |                               |                                                                                                                       |

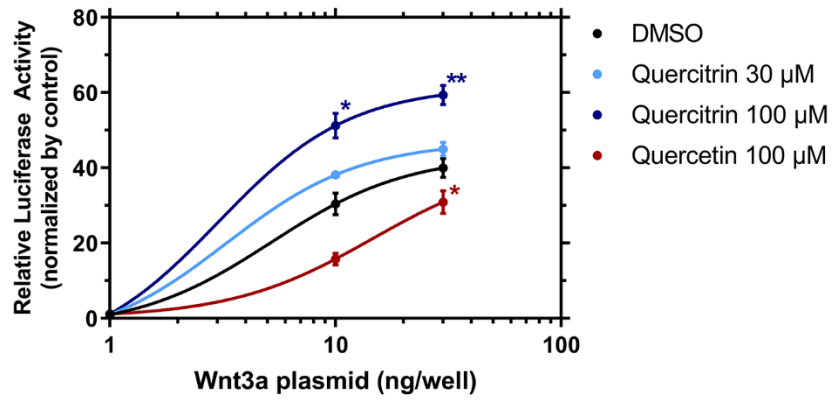

**Figure S1.** Quercitrin potentiates the signaling after Wnt ligand stimulation. TOPFLASH assay of HEK293T transfected with increasing amounts (1, 10, 30 ng/well) of hWnt3a plasmid. HEK293T cells were treated overnight with quercitrin or quercetin (a Wnt signaling inhibitor). ( $n=3$ , performed in triplicate, two-way ANOVA analysis considering the DMSO as the control condition followed by a Dunnett multiple comparison test.  $*p<0.05$ ,  $**p<0.01$ ). Error bars represent mean  $\pm$  SD.

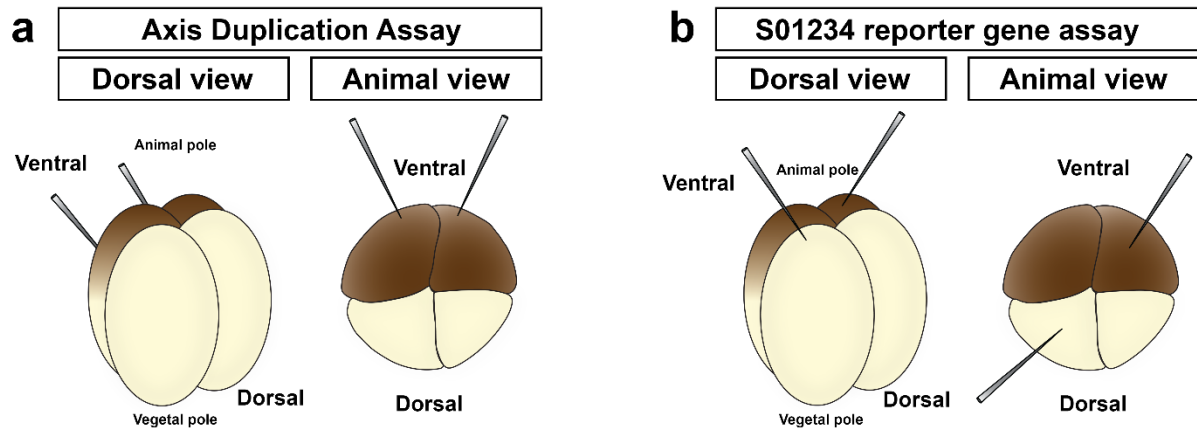

**Figure S2.** Injection scheme of 4-cell *Xenopus laevis* embryos. **(a)** For the Axis Duplication Assay, the ventral blastomeres were equatorially injected. **(b)** For the S01234 reporter gene assay, we injected one ventral and one dorsal blastomeres.

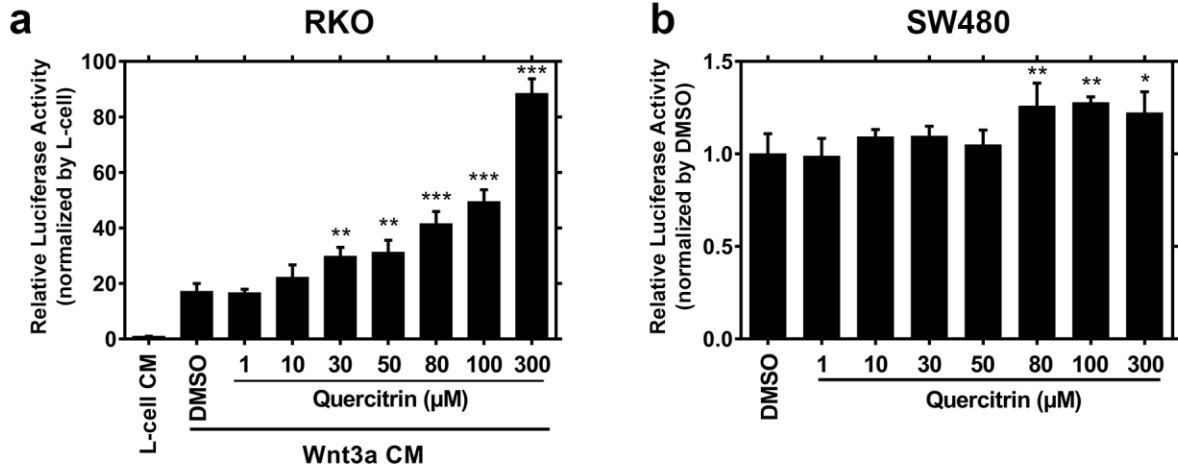

**Figure S3.** Quercitrin does not potentiate the Wnt signaling in the SW480 tumoral cell line. **(a)** RKO B/R cell line was treated with L-cell CM, Wnt3a CM, the vehicle DMSO, or increasing concentrations of quercitrin ( $n=3$ , performed in triplicate, one-way ANOVA followed by Dunnett's multiple comparisons test,  $**p < 0.01$ ,  $***p < 0.001$ ). Error bars denote mean  $\pm$  SD. **(b)** SW480 B/R reporter gene cell lines were treated with DMSO or increasing concentrations of quercitrin ( $n=3$ , performed in triplicate, one-way ANOVA followed by Dunnett's multiple comparisons test,  $*p < 0.05$ ,  $**p < 0.01$ ). Error bars denote mean  $\pm$  SD.

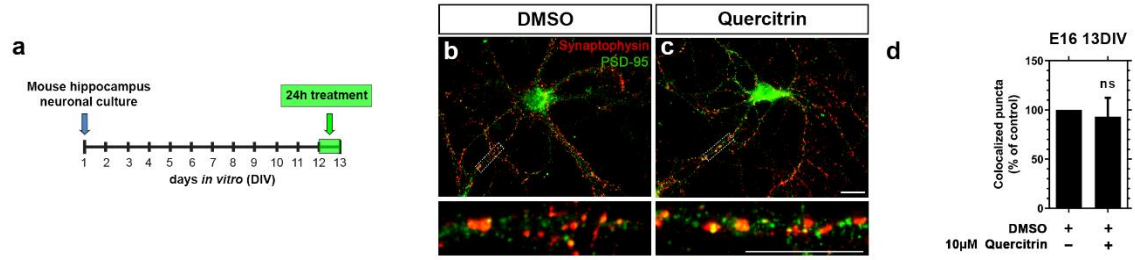

**Figure S4.** Quercitrin per se does not induce synaptogenesis *in vitro*. **(a)** Protocol illustration of *in vitro* hippocampus neuronal culture and treatment. **(b-c)** Synaptophysin and PSD-95 immunostaining of hippocampal neuronal culture. **(d)** Colocalized puncta quantification shows that 10 μM quercitrin per se does not induce synaptogenesis ( $n=3$ , performed in duplicate, Welch t-test statistical analysis). Error bars denote mean  $\pm$  SEM. Scale bars denote 10 μm.



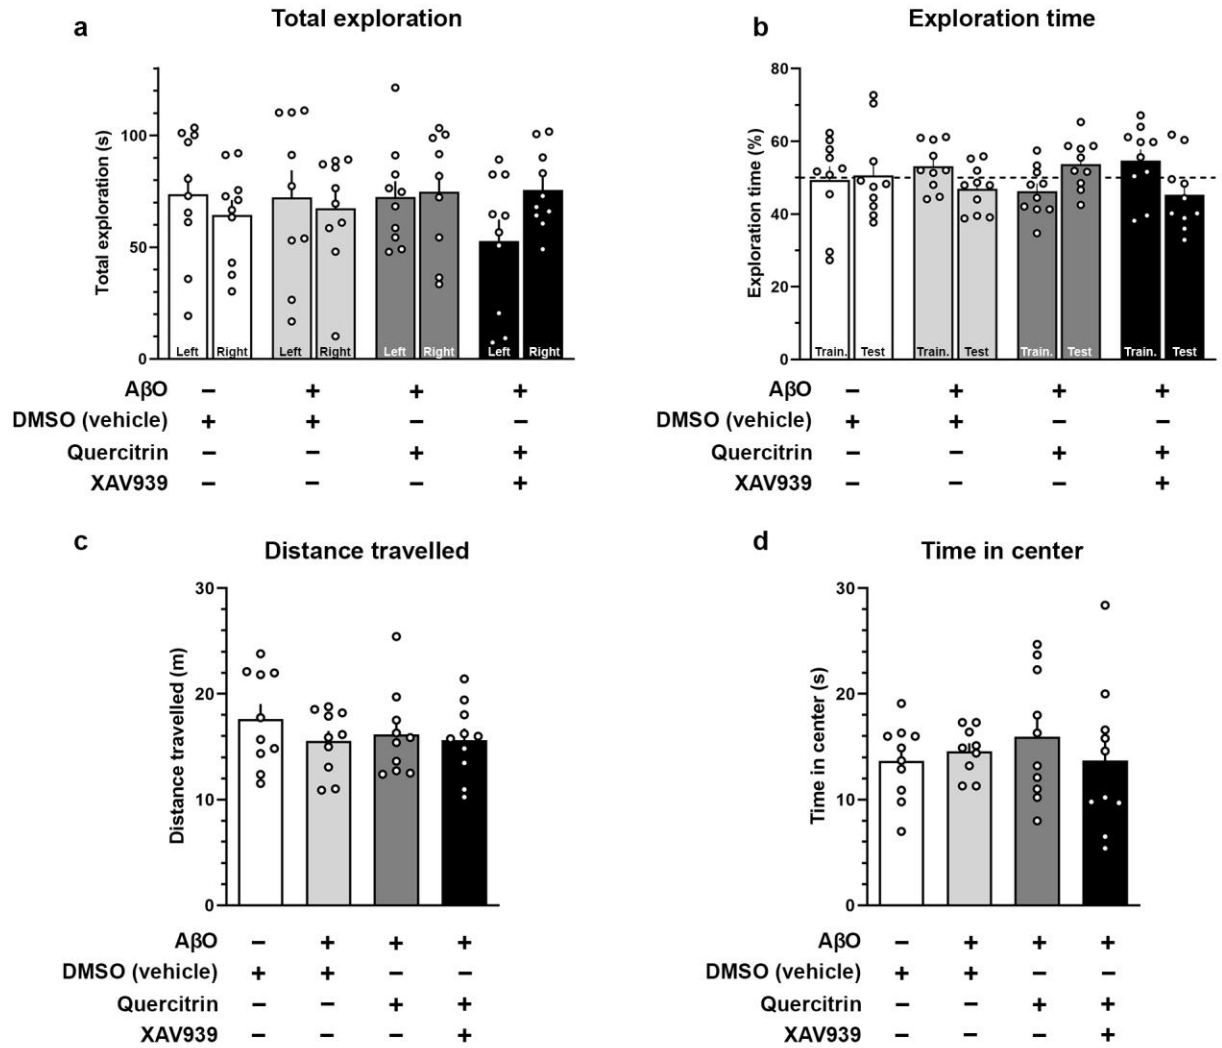

**Figure S5.** ICV injection does not alter the experimental exploration time of injected mice. (a) Total exploration time (s) of the left and right objects in the novel object recognition (NOR) training. (b) Exploration time (% of total time) in both objects under training and testing conditions. (c) Distance travelled (m) in the Open Field analysis. (d) Time (s) in center during the Open Field analysis.
